# Supplementary material
Source: PubMed Central journal article supplement (PMC3529071)
Supplement: 1113960109_pnas.201113960SI.pdf [file 1113960109_pnas.201113960SI.pdf]

# Supporting Information

Overdevest et al. 10.1073/pnas.1113960109

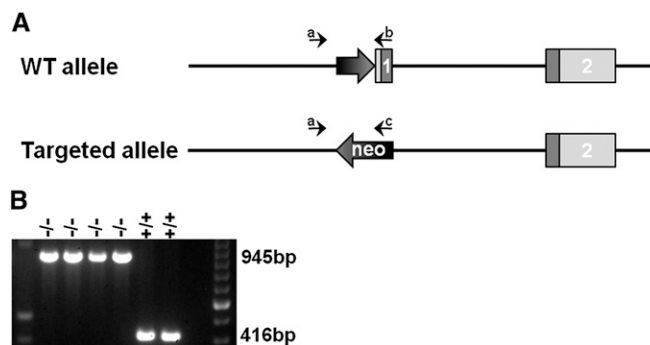

**Fig. S1.** Development of *Cd24a*<sup>-/-</sup> mice and genotyping analysis. (A) Schematic of targeted *Cd24a* deletion. The promoter and first exon were replaced with a neomycin-resistance expression cassette, as previously described (1, 2). (B) PCR of genomic DNA using a set of three primers to create gene products specific to WT (+/+) and *Cd24a*-deficient (-/-) mice.

1. Nielsen PJ, et al. (1997) Altered erythrocytes and a leaky block in B-cell development in CD24/HSA-deficient mice. *Blood* 89:1058–1067.
2. Wenger RH, et al. (1995) B-cell maturation in chimaeric mice deficient for the heat stable antigen (HSA/mouse CD24). *Transgenic Res* 4:173–183.
